# Supplementary material for: Partial Agonist Activity of Neonicotinoids on Rat Nicotinic Receptors: Consequences over Epinephrine Secretion and In Vivo Blood Pressure
Source: MDPI journal article supplement (doi:10.3390/ijms22105106), 2021-05-12
Supplement: s1 [file s1]

| nAChRs<br>(species)          | Expression<br>system | Assay               | NIC                    | ACE                 | CLO                     | IMI                    | Agonist<br>effect | References                         |
|------------------------------|----------------------|---------------------|------------------------|---------------------|-------------------------|------------------------|-------------------|------------------------------------|
| $\alpha 3\beta 4$ (rat)      | Xenopus<br>oocyte    | Membrane<br>current | $EC_{50} = 4.62 \mu M$ | $EC_{50} = 0.13 M$  | $EC_{50} = 8.39 mM$     | n/a                    | weak              | This study                         |
| $\alpha 4\beta 2$<br>(human) | HEK 293              | Membrane<br>current | n/a                    | n/a                 | $EC_{50} \sim 0.100 mM$ | $EC_{50} \sim 0.05 mM$ | weak              | Li <i>et al.</i> , 2011<br>(41)    |
| $\alpha 7$ (rat)             | Xenopus<br>oocyte    | Membrane<br>current | n/a                    | $EC_{50} = 0.74 mM$ | $EC_{50} = 0.74 mM$     | n/a                    | strong            | Cartreau <i>et al.</i> , 2018 (42) |

n/a: not available.

Table S1

| nAChR subunit | Primer designation | Primer sequence (5'-3') <sup>a</sup>   | Purpose          |
|---------------|--------------------|----------------------------------------|------------------|
| $\alpha 3$    | nAChSA             | GCACCAGAGTGTCTCCCTCCC                  | Full-length cDNA |
|               | nAChRB             | AGCCTCGATGAACAGTGACAG                  |                  |
|               | nAChS1             | ttaaaagaattcgccaccATGGGTGTTGTGCTGCTCCC | pGEMHE-ORF       |
|               | nAChR2             | tgatataagcttCTATGTGTCATCTCTGGCCATCA    |                  |
| $\beta 4$     | nAChSC             | GGCTGCCACCCGGCTGGCC                    | Full-length cDNA |
|               | nAChRD             | ACGCCGGGTAGCCTAGGAGTC                  |                  |
|               | nAChS3             | ttaaaagaattcgccaccATGAGGGGTACGCCCCTG   | pGEMHE-ORF       |
|               | nAChR4             | tgatataagcttCTAGGAGTCCTTGGAGGGTGC      |                  |

<sup>a</sup>The restriction sites and Kozak sequence are indicated by single (EcoRI; HindIII) and double underlining, respectively.

Table S2

| nAChR subunit | Nucleotide variation (CNS vs AM) | Location <sup>a</sup>    | Amino-acid modification |
|---------------|----------------------------------|--------------------------|-------------------------|
| α3            | T816C                            | M2                       | -                       |
|               | C903T                            | M3                       | -                       |
|               | G1011A                           | M3-M4 intracellular loop | -                       |
|               | G1102A                           | M3-M4 intracellular loop | G368S                   |
| β4            | T411C                            | E loop                   | -                       |
|               | G1261C                           | M3-M4 intracellular loop | G421R                   |

<sup>a</sup> Functional miscellaneous features of each nAChR subunit transcript are extracellular loops (A to F loops) involved in the ACh binding site and transmembrane domains (M1 to M4) linked by intracellular and extracellular loops and forming the channel pore.

Table S3

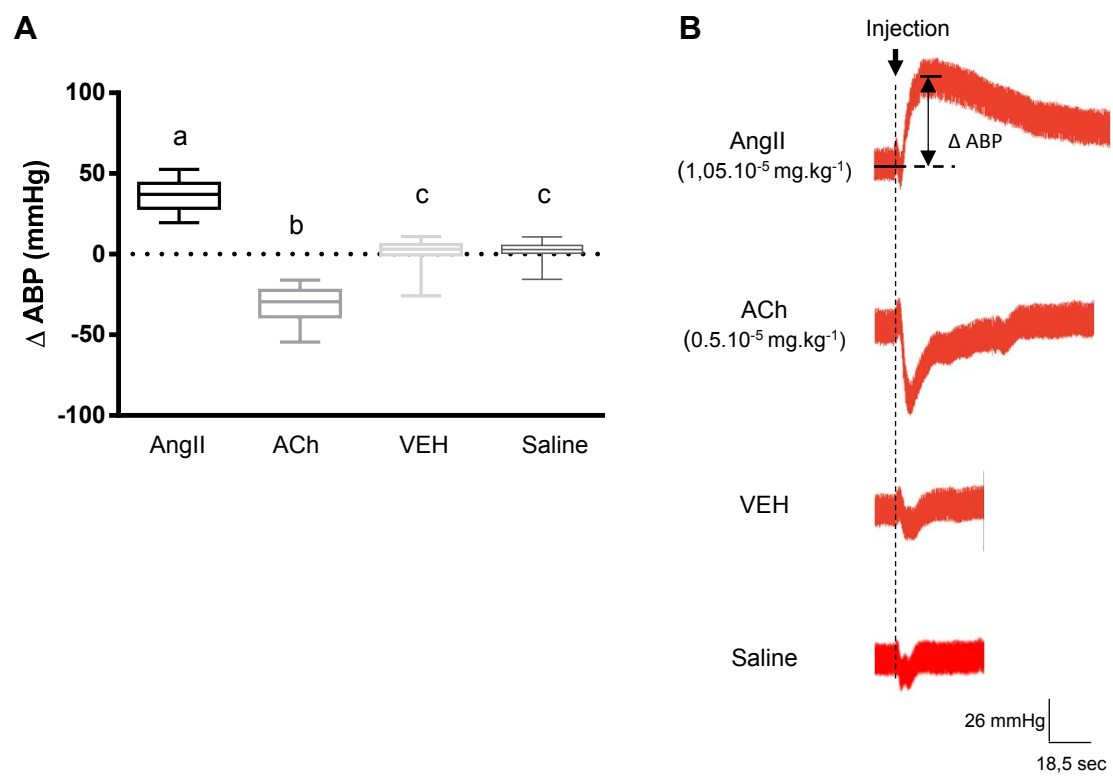

Figure S1

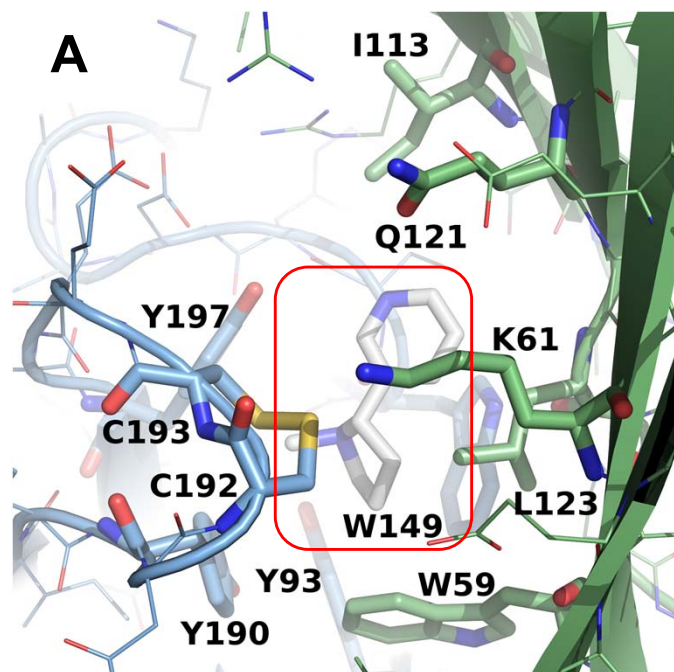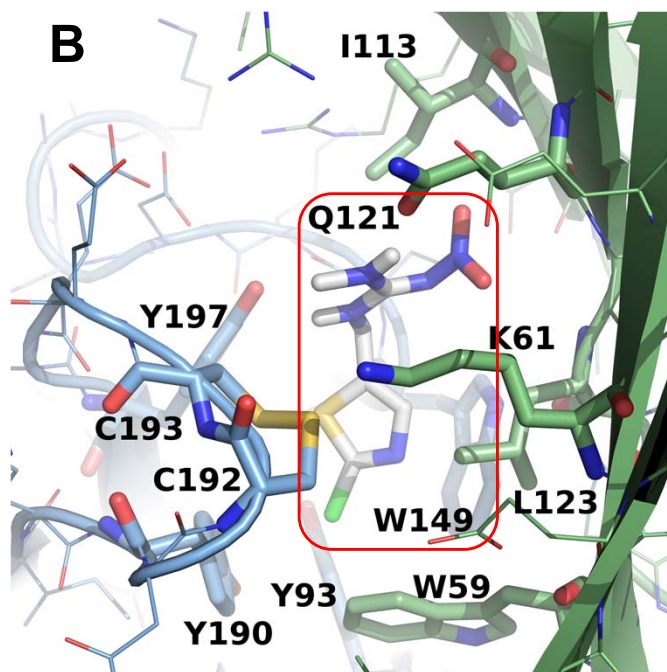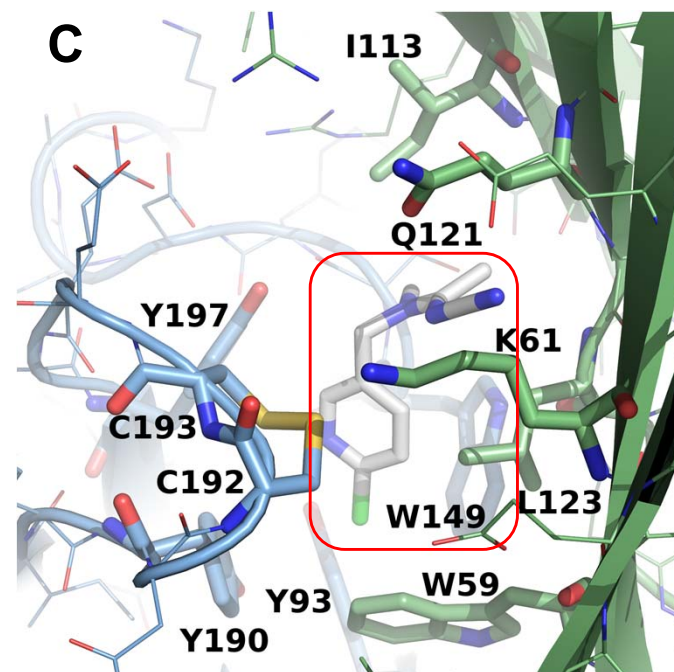

Figure S2

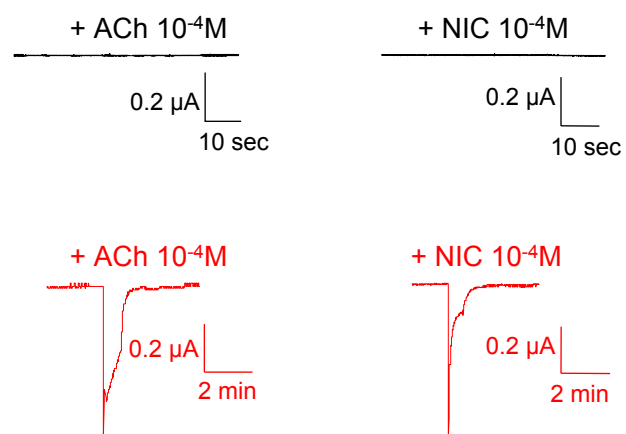

Figure S3

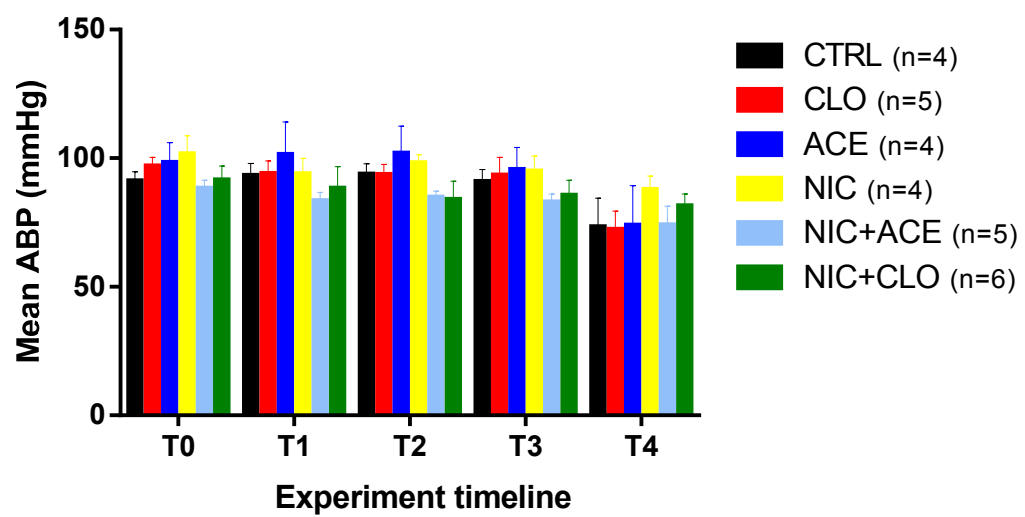

Figure S4
